# Supplementary material for: Supraphysiological levels of GDF11 induce striated muscle atrophy
Source: PubMed Central journal article supplement (PMC5376753; doi:10.15252/emmm.201607231), 2017-03-07
Supplement: EMMM-9-531-s001.pdf [file EMMM-9-531-s001.pdf]

## Expanded View Figures

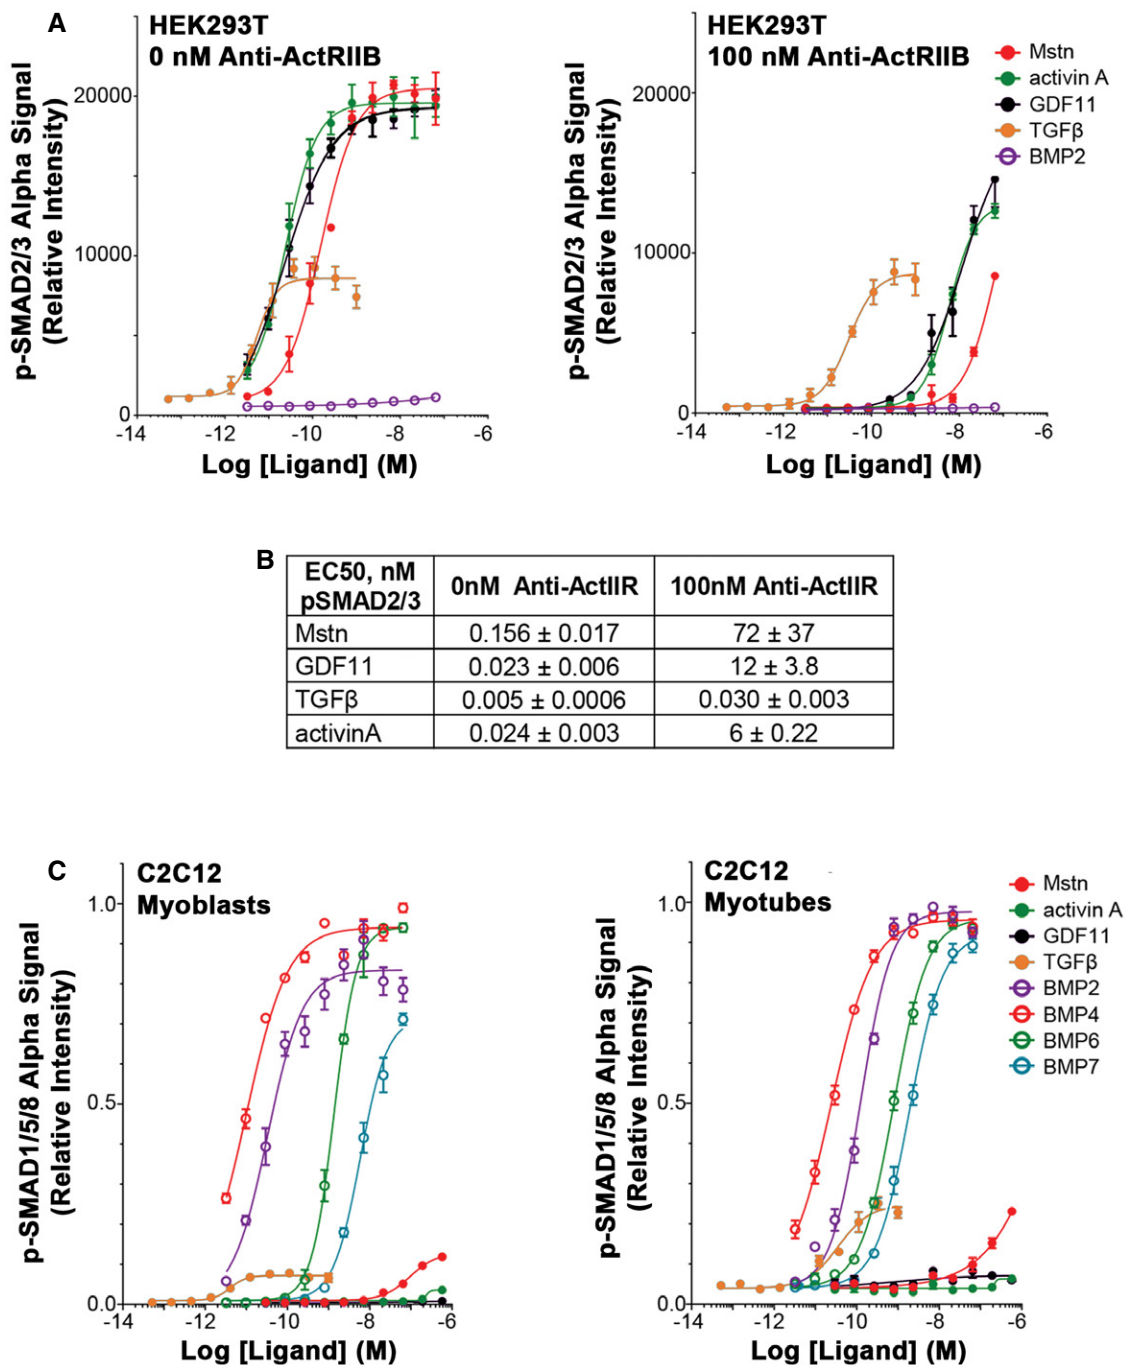

**Figure EV1. Additional SMAD response assays to TGFβ ligands.**

A, B Significant shifts in the response of HEK293T cells to Mstn, GDF11, and activin A are observed with the addition of ActRIIB antibody (anti-ActRIIB), when 0 or 100 nM anti-ActRIIB was applied to HEK293T cells overnight prior to ligand addition and AlphaLISA evaluation. Note that the 0 nM antibody treatment panel is the un-normalized form of Fig 1A left. EC<sub>50</sub> values (in nM) are listed for the antibody data in (B).

C p-SMAD1/5/8 response of C2C12 myoblasts (left) and myotubes (right) in response to TGFβ family member ligands. All cells were stimulated with ligand 1 h prior to lysis and evaluation by AlphaLISA.

Data Information: Values are displayed as mean ± SEM; *n* = 4 for all data points.

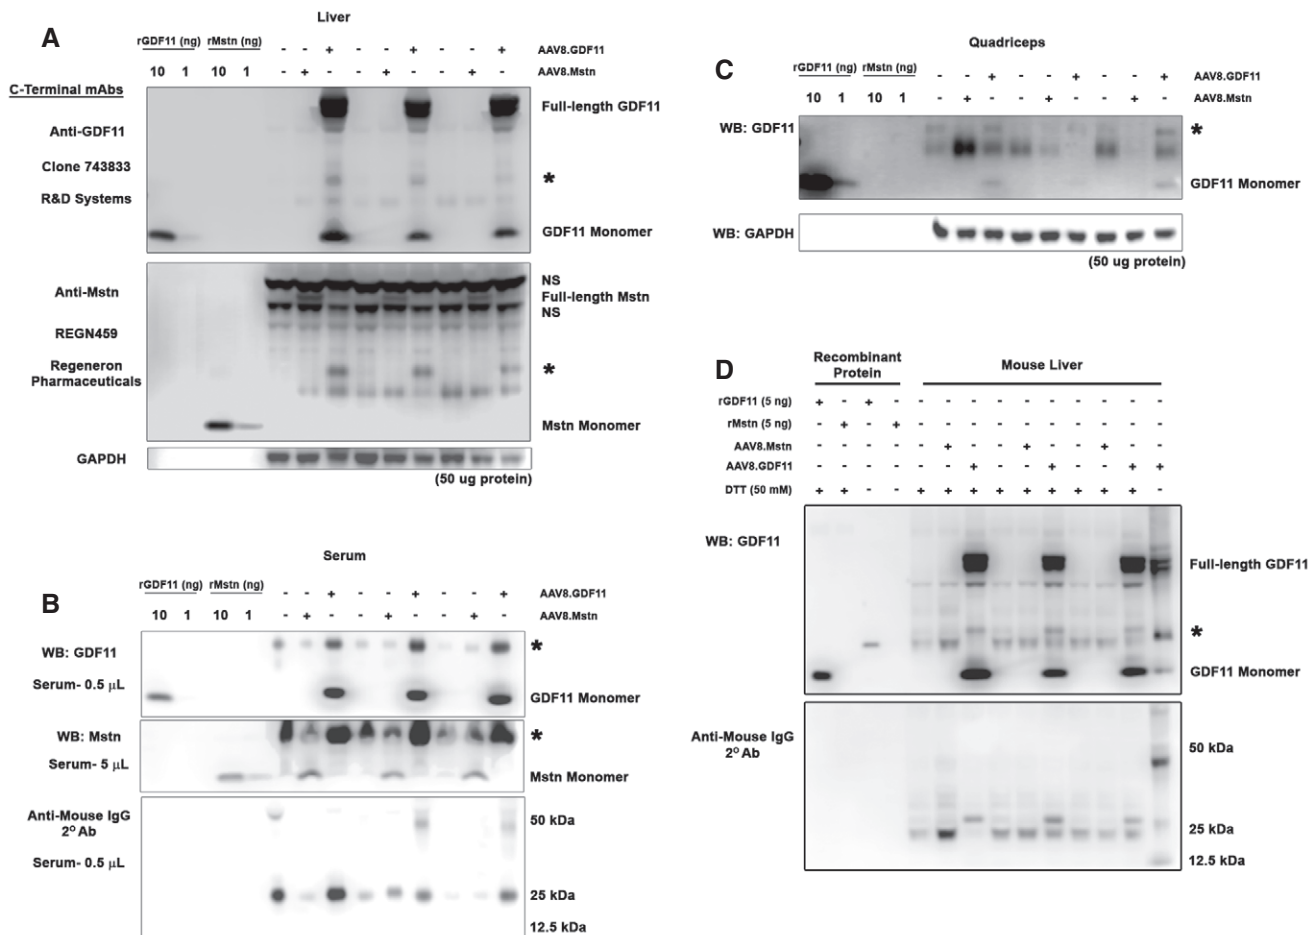

**Figure EV2. Antibody validation and overexpression verification.**

A–C Twelve-week-old C57BL/6 male mice were injected i.p. with PBS, a liver-specific myostatin (Mstn) construct packaged into AAV2/8 (AAV8.Mstn), or a liver-specific GDF11 construct packaged into AAV2/8 (AAV8.GDF11; *n* = 3). Verification of GDF11 and Mstn overexpression in the liver (A), serum (B), and quadriceps (C) of treated mice using clone 743833 anti-GDF11 (R&D Systems #MAB19581) and REGN459 anti-Mstn (Regeneron Pharmaceuticals) mouse monoclonal antibodies using samples pre-incubated with protein A/G-coated agarose beads, to reduce endogenous IgGs, and prepared in reducing conditions. The star (\*) represents a 25 kDa band that is specifically prominent in AAV8.GDF11-treated samples, however, is detected by anti-mouse IgG secondary antibodies. Note that these are the full immunoblot images for those found in Fig 3B–D.

D Immunoblotting for GDF11 (using R&D #MAB19581) with reduced (50 mM DTT) and non-reduced (no DTT) forms of recombinant GDF11 and Mstn, and liver samples from control, AAV8.Mstn, and AAV8.GDF11 mice subjected to IgG depletion with both protein A/G (targets IgG heavy chains) and protein L (targets IgG light chains)-coated agarose beads. The differential detection of anti-mouse IgG immunoreactive bands between AAV8.GDF11-treated samples and the other groups indicates that GDF11 modifies anti-mouse IgG immunoreactive species which do not appear to be depletable by incubation with protein A/G or L. The non-reduced AAV8.GDF11 sample (lane 14) demonstrates both 25 and 12.5 kDa bands immunoreactive with anti-mouse IgG secondary antibodies, as well. The star (\*) represents the ambiguous 25 kDa band mentioned above.

**A**

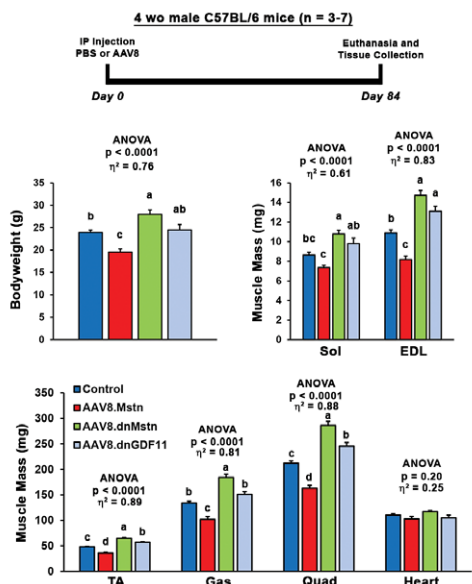

**B**

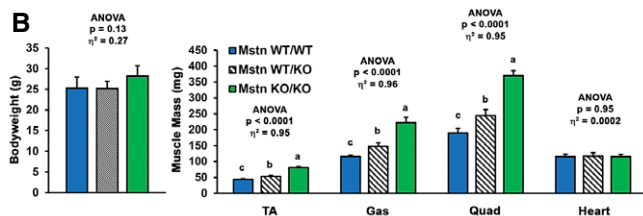

**Figure EV3. Long-term Mstn/GDF11 manipulation *in vivo*.**

A Four-week-old C57BL/6 male mice were injected IP with PBS (control;  $n = 6$ ) or  $1 \times 10^{12}$  gc of AAV2/8 packaged liver-specific constructs of full-length Mstn (AAV8.Mstn;  $n = 7$ ), Mstn D76A propeptide (AAV8.dnMstn;  $n = 3$ ), or GDF11 D120A propeptide (AAV8.dnGDF11;  $n = 4$ ) and euthanized at 16 weeks of age (84 day treatments).

B Body weights and muscle masses of 12-week-old Mstn<sup>WT/WT</sup> ( $n = 6$ ), Mstn<sup>WT/KO</sup> ( $n = 6$ ), and Mstn<sup>KO/KO</sup> ( $n = 4$ ) mice congenic on a C57BL/6 background.

Data Information: Values are presented as mean  $\pm$  SEM. Statistical analysis performed using one-way ANOVA analysis with Tukey's HSD *post hoc* test (non-connecting letters indicate  $P < 0.05$  between groups) and effect size presented as eta-squared ( $\eta^2$ ).

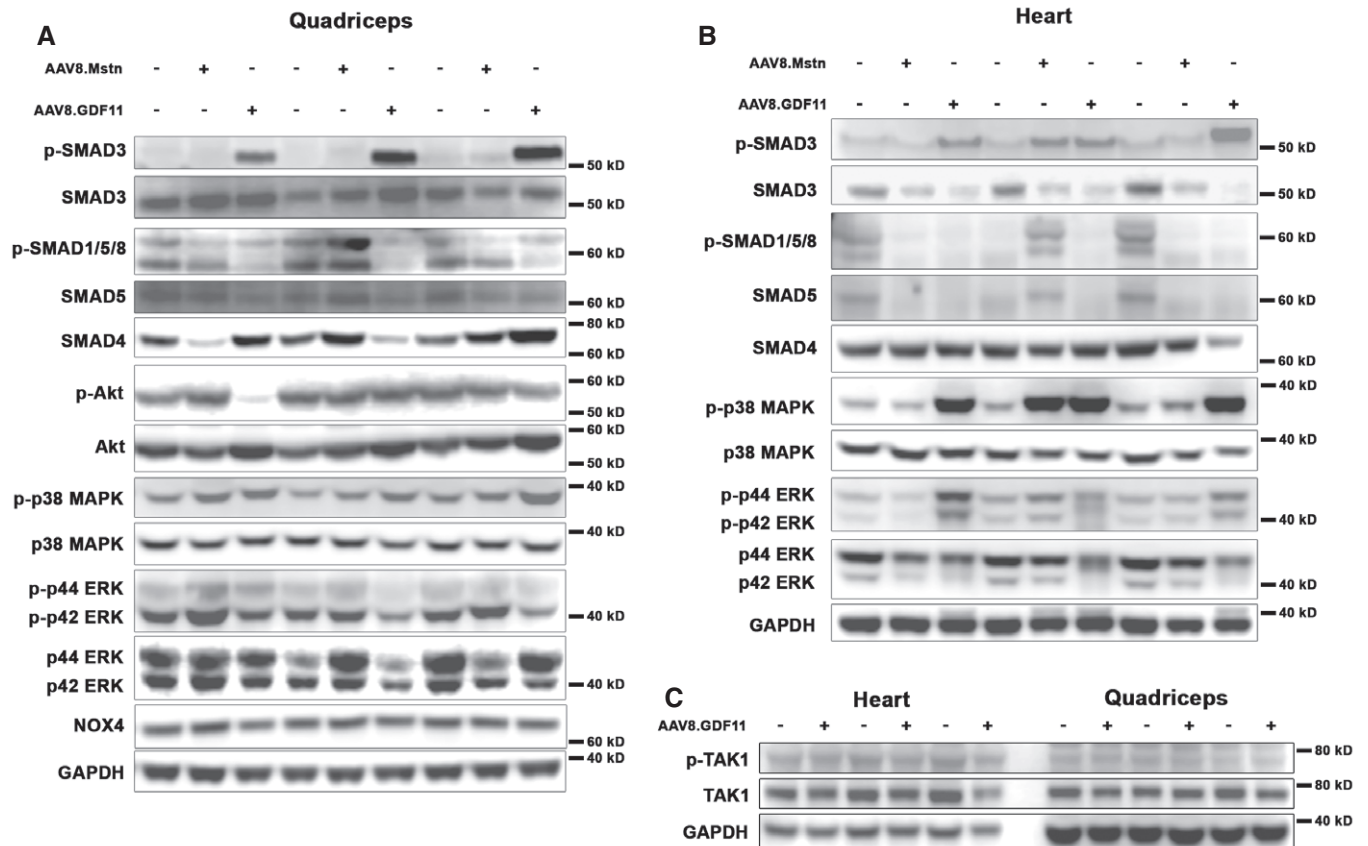

**Figure EV4. Full immunoblots from AAV8.Mstn- and AAV8.GDF11-treated mice.**

A, B Quadriceps (A) and heart (B) lysates from mice described in Figs 2 and EV2 were immunoblotted for phosphorylated and total content of SMAD3, SMAD1/5/8, Akt, p38 MAPK, ERK1/2, total SMAD4, and total NOX4. GAPDH content was used as a loading control and normalization standard. Note that the cropped version of many of these images is found in Fig 5A and B.

C Phosphorylation of TAK1 is not different between control and AAV8.GDF11-treated hearts or quadriceps.

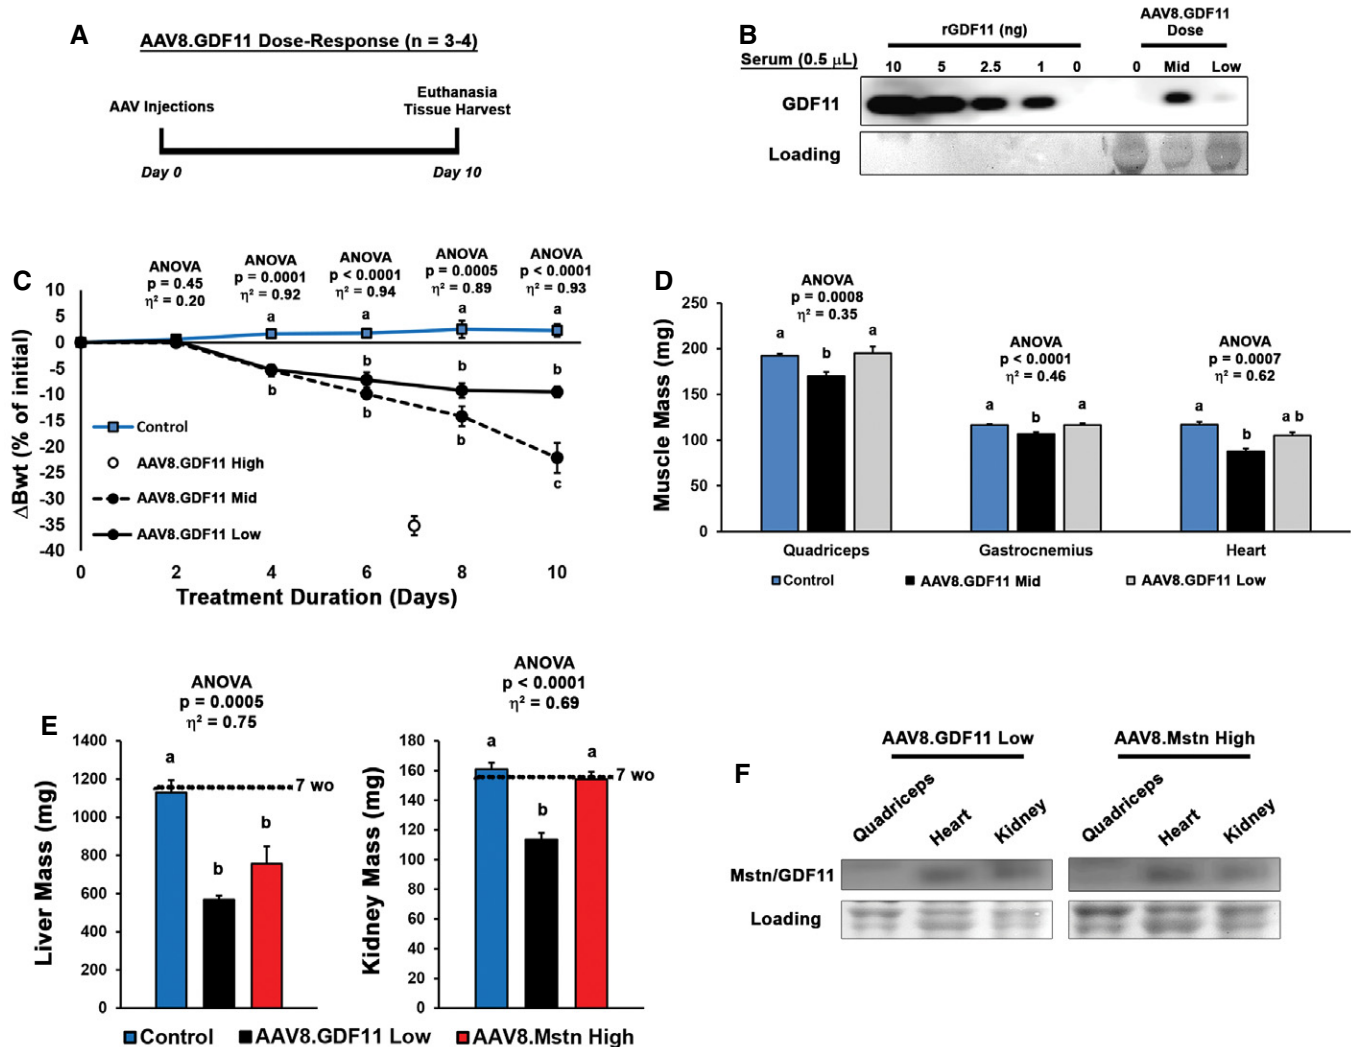

**Figure EV5. Lower expression levels of GDF11 induce loss of body weight and muscle atrophy.**

- A Eleven-week-old C57BL/6 male mice received i.p. injections of PBS (control;  $n = 4$ ),  $1 \times 10^{11}$  gc of AAV8.GDF11 (mid dose;  $n = 3$ ), or  $5 \times 10^{10}$  gc of AAV8.GDF11 (low dose;  $n = 3$ ), and their body weights were monitored every other day until the  $1 \times 10^{11}$  gc AAV8.GDF11 group required euthanasia on day 10.
- B Immunoblotting of serum samples for GDF11 demonstrates expression levels of 0.5–1.6 ng/ $\mu$ L and 0.26–0.43 ng/ $\mu$ L for the mid- and low-dose groups, respectively.
- C Change in mouse body weights (Bwt) across the 10-day study by the AAV8.GDF11 treatment groups, including terminal values for the previous 7-day cohort treated with  $1 \times 10^{12}$  gc of AAV8.GDF11 (high dose).
- D Mass of the quadriceps, gastrocnemius, and heart of the 10-day study mice ( $n = 12$  for control mice by the inclusion of untreated age-matched mice, resulting in a larger, homogenous data set).
- E Liver and kidney mass of 7-week-old C57BL/6 male mice were treated with PBS (control;  $n = 5$ ), AAV8.GDF11 low dose ( $n = 4$ ), or AAV8.Mstn high dose ( $n = 5$ ) for 16 days (see Fig 6B). The mean values for 7-week-old mice from this colony ( $n = 5$ ) are indicated by the dotted line to show starting masses.
- F Immunoblotting comparison of monomeric GDF11 and Mstn levels in quadriceps, heart, and kidney demonstrate that differential effects are not due to differential accumulation of the ligands in tissue.

Data information: Values are displayed as mean  $\pm$  SEM. Statistical analysis performed using one-way ANOVA analysis with Tukey's HSD *post hoc* test (non-connecting letters indicate  $P < 0.05$  between groups) and effect size presented as eta-squared ( $\eta^2$ ). Note that "b" on Day 4 of panel (C) refers to the 2 overlapping groups.
